1 **Metabolic rate is negatively linked to adult survival but does not explain latitudinal differences in**  
2 **songbirds**

3  
4 **Andy J. Boyce<sup>1,2</sup>, James C. Mouton<sup>3</sup>, Penn Lloyd<sup>4,†</sup>, Blair O. Wolf<sup>5</sup>, and Thomas E. Martin<sup>6</sup>**

5  
6 <sup>1</sup>Montana Cooperative Wildlife Research Unit, Wildlife Biology Program, University of Montana,  
7 Missoula, MT, USA

8 <sup>3</sup>Montana Cooperative Wildlife Research Unit, Division of Biological Sciences, University of Montana,  
9 Missoula, MT, USA

10 <sup>4</sup>FitzPatrick Institute of African Ornithology, Department of Science and Technology/National Research  
11 Foundation Centre of Excellence, University of Cape Town, Private Bag X3, Rondebosch, 7701, South  
12 Africa.

13 <sup>5</sup>Department of Biology, University of New Mexico, Albuquerque, NM, USA

14 <sup>6</sup>U.S. Geological Survey, Montana Cooperative Wildlife Research Unit, University of Montana,  
15 Missoula, MT, USA

16 <sup>†</sup>Present address: Biodiversity Assessment and Management Pty Ltd, PO Box 1376, Cleveland, Qld 4163,  
17 Australia

18  
19 \*Correspondence and present address: Correspondence and present address: Andy J. Boyce, Conservation  
20 Ecology Center, Smithsonian Conservation Biology Institute, Front Royal, VA, USA

21 E-mail: [andyjboyce@gmail.com](mailto:andyjboyce@gmail.com)

22  
23  
24 **Author contribution statement:** AJB & TEM formulated the idea. AJB, TEM & PL & JCM conducted  
25 fieldwork and performed analyses. AJB wrote the initial manuscript. BOW provided equipment and  
26 training. All authors contributed to revisions of the manuscript.

27 **ABSTRACT**

28 Survival rates vary dramatically among species and predictably across latitudes, but causes of this  
29 variation are unclear. The rate of living hypothesis posits that physiological damage from metabolism  
30 causes species with faster metabolic rates to exhibit lower survival rates. However, whether increased  
31 survival commonly observed in tropical and south temperate latitudes is associated with slower metabolic  
32 rate remains unclear. We compared metabolic rates and annual survival rates across 46 species that we  
33 measured, and 147 species from literature data across northern, southern, and tropical latitudes. High  
34 metabolic rates were associated with lower survival but latitude had substantial direct effects on survival  
35 independent of metabolism. The inability of metabolic rate to explain latitudinal variation in survival  
36 suggests 1) that species may evolve physiological mechanisms that mitigate physiological damage from  
37 cellular metabolism, and 2) a larger role of extrinsic environmental, rather than intrinsic metabolic, causes  
38 of latitudinal differences in mortality.

39

40 **Key words:** physiology, adult survival, metabolism, life history theory, latitude, pace of life

## 41 INTRODUCTION

42 Adult survival rate varies extensively among species and is a major influence on fitness, demography and  
43 life-history evolution (Ashmole 1963; Stearns 1977; Promislow & Harvey 1990; Martin 2015). The rate  
44 of living hypothesis has been proposed as a physiological mechanism underlying variation in survival  
45 rate. Production of damaging reactive oxygen species (ROS) from metabolism is thought to cause greater  
46 oxidative damage and shorter life (Pearl 1928; Harman 1956; Balaban *et al.* 2005; Brys *et al.* 2007;  
47 Monaghan *et al.* 2009). Yet, metabolism may be decoupled from senescence because mechanisms to  
48 prevent or repair damage (e.g. endogenous antioxidants, mitochondrial membrane composition and  
49 telomere dynamics) may coevolve with metabolic rate (Brand 2000; Monaghan & Haussmann 2006;  
50 Hulbert *et al.* 2007; Costantini 2008; Salin *et al.* 2015; Skrip & McWilliams 2016; Vagasi *et al.* 2018).  
51 Furthermore, survival rates may be unrelated to the accumulation of physiological damage entirely.  
52 Extrinsic sources of mortality, such as harsh weather or predation, may be more important in shaping  
53 variation in survival. Consequently, whether metabolic rate explains variation in adult survival across  
54 species remains unclear (Costantini 2008).

55 Comparative studies show that metabolic rate is negatively correlated with maximum observed  
56 lifespan (MLS) in birds and mammals at broad taxonomic scales (Trevelyan *et al.* 1990; Hulbert *et al.*  
57 2007). However, the overriding influence of mass on both lifespan and metabolism obscures the  
58 independent effect of metabolic rate on lifespan in such studies (Speakman 2005). Moreover, other  
59 comparisons raise questions about this relationship. Bats and birds have higher metabolic rates but are  
60 longer-lived than terrestrial mammals of similar size, suggesting that metabolism and lifespan can be  
61 decoupled, at least across broad taxonomic groups (Holmes & Austad 1995; Holmes *et al.* 2001; Munshi-  
62 South & Wilkinson 2010). Furthermore, measurements of MLS represent exceptional rather than an  
63 average across individuals and are sensitive to variation in sample size, recapture probability and quality  
64 of record keeping (Krementz *et al.* 1989; Promislow 1993). In addition, MLS is often based on captive  
65 individuals that are well-fed and isolated from disease, predation and other extrinsic sources of mortality  
66 that are ubiquitous in wild populations (i.e. de Magalhães & Costa 2009). Direct estimates of annual

67 survival rate are not susceptible to these issues.

68         Adult survival rates vary substantially across latitudes with tropical species generally exhibit  
69 higher survival rates than south temperate or especially north temperate species. Yet evidence that  
70 metabolic rate underlies variation in adult survival across latitudes is mixed. For example, lower  
71 metabolic rates have been found in tropical songbirds (Wikelski *et al.* 2003; Wiersma *et al.* 2007;  
72 Londoño *et al.* 2015) and because tropical species are generally longer-lived than temperate relatives  
73 (Sandercock *et al.* 2000; Martin 2015; Martin *et al.* 2017), this pattern has been interpreted as evidence  
74 that metabolic rate and adult survival are causally linked. However, other studies found no difference in  
75 metabolic rates across latitudes in either adult birds (Vleck & Vleck 1979; Bennett & Harvey 1987) or  
76 embryos (Martin *et al.* 2013). Furthermore, using latitude as a proxy for survival rate is problematic  
77 because survival rates vary extensively among species within latitudes that yield overlap among species  
78 between latitudes (reviewed in Martin *et al.* 2017). Metabolic rate and adult survival appeared to be  
79 negatively correlated across latitudes in songbirds in one study (Williams *et al.* 2010). However, methods  
80 used for estimating survival rates differed between latitudes, which can obscure patterns across sites  
81 (Martin *et al.* 2017), and site effects were not included in a statistical test. Within sites, metabolic rate is  
82 sometimes negatively linked to adult survival probability (Scholer *et al.* 2019) and sometimes unrelated  
83 (Bech *et al.* 2016). Ultimately, studies that directly compare metabolic rates with robust estimates of adult  
84 survival from wild populations are needed.

85         Here, we test whether metabolic rate explains variation in adult survival probability across  
86 latitudes. We directly measured resting metabolic rate (RMR) and estimated adult mortality probability  
87 for songbirds at North temperate, tropical and South temperate field sites. We also compiled a global  
88 database of basal metabolic rate (BMR) and adult survival data for 147 species from the literature. We  
89 used phylogenetically-informed path analysis to test whether metabolic rate explained interspecific  
90 variation in adult survival within and across latitudes.

91

92 **METHODS**

93 **Study species**

94 Passerine birds (songbirds) are a good group in which to examine these issues. Passerines are diverse (~  
95 6,000 species) and show broad ecological and morphological variation (del Hoyo *et al.* 2017). They show  
96 large interspecific variation in both metabolic rate (McKechnie & Wolf 2004; Wiersma *et al.* 2007;  
97 Londoño *et al.* 2015; McKechnie 2015) and adult survival probability (Johnston *et al.* 1997; Sandercock  
98 *et al.* 2000; Martin 2015; Martin *et al.* 2015, 2017).

99 **Field data**

100 Resting metabolic rate measurements and estimation of adult survival probability were conducted on  
101 populations of passerine birds at Kinabalu Park, Sabah, Malaysia (6°N, 116°E), the Coconino National  
102 Forest, Arizona, USA (35°N, 111°W) and the Koeberg Nature Reserve, Western Cape, South Africa  
103 (34°S, 18°E). Metabolic measurements were performed during the breeding season at both sites  
104 (Malaysia; February – June, 2013 – 2016, Arizona; May – July, 2015, South Africa; August – October  
105 2016).

106 Birds were captured for metabolic measurements by both passive and targeted mist-netting.  
107 Breeding females (based on presence of a brood patch) were excluded to minimize disruption of nesting  
108 and because the extreme vascularization of the avian brood patch is likely to alter RMR. Birds were  
109 transported to the lab and held for 1-2 hrs, depending on mass, to ensure they were post-absorptive during  
110 measurements. Birds were watered before and after and returned to point of capture upon completion of  
111 metabolic measurements.

112 Adult survival probability was estimated by banding, resighting and recapturing birds, using the  
113 same long-term protocols at Malaysia and Arizona sites (Martin *et al.* 2015). Birds were captured by both  
114 passive mist-netting and target-netting for six hours each day beginning at sunrise. Twelve nets were  
115 deployed at each netting plot, which were distributed uniformly across accessible areas of each site. Each  
116 plot was visited three times at equal intervals over the course of the field season. Birds were marked with  
117 unique combinations of one alpha-numeric aluminum band and three color-bands to facilitate individual  
118 identification via resighting. In addition to subsequent recaptures, birds were resighted opportunistically

119 each day for the duration of each field season. Similar mark-resight-recapture protocols were used in  
120 South Africa (see Lloyd *et al.* 2014). Resulting estimates (see Statistical Analyses) are based on 10  
121 consecutive years of mark-recapture-resighting effort in Borneo, 21 in Arizona, and 7 in South Africa.

## 122 **Metabolic measurements**

123 We measured RMR using an open-flow respirometry system similar to that described in Gerson *et al.*  
124 (2015). We used 2 L and 5 L transparent plastic containers (Rubbermaid, Atlanta, GA, USA) as metabolic  
125 chambers, depending on the size of the study species. These containers were modified to include incurrent  
126 and excurrent air ports, with wire mesh platforms and plastic perches to allow the subject to rest  
127 comfortably. The bottom of the chamber contained a 2cm layer of mineral oil to trap moisture and gas  
128 associated with feces. Containers were placed inside a large cooler, which was modified to hold an  
129 integral peltier device (model AC-162, TE Technology, Traverse City, MI), connected to a temperature  
130 controller (Gerson *et al.* 2015) to regulate chamber air temperature. Incurrent air was provided by a high  
131 capacity pressure/vacuum pump (model DAA-V515-ED, Gast Manufacturing, Benton Harbor, MI, USA),  
132 and was routed through a coil of copper tubing prior to entering the inner chamber to facilitate rapid  
133 temperature equilibration. Air flow rates were regulated by mass-flow controllers (Alicat Scientific,  
134 Tucson, AZ) with an accuracy of < 2% of the reading and their calibration was checked annually against a  
135 factory five-point calibration Alicat mass flow meter used only for this purpose. Flow rates were varied  
136 from 2-15 L/min depending on temperature and mass of the study species. Incurrent and excurrent air  
137 were both subsampled at rates between 250 and 500 ml/min and CO<sub>2</sub> and H<sub>2</sub>O were measured using a  
138 portable gas-analyzer (LI-COR model LI-840a, Lincoln, NE, USA) zeroed and then spanned against a gas  
139 with a known CO<sub>2</sub> concentration (1854±0.2 ppm). These data were sampled every second and recorded  
140 using Expedata (Sable Systems, Las Vegas, NV, USA).

141 Humidity of incurrent air was regulated using a dew-point generator constructed of three Nalgene  
142 bottles connected in series. Air was bubbled through water in the first two bottles, and the third was empty  
143 and served as a water trap. The entire device was then submerged in a water bath kept at approximately  
144 10°C by the addition of small ice-packs. This device prevented rapid fluctuations in humidity due to either

145 ambient air temperature or ambient humidity and also prevented condensation occurring in the system. By  
146 adjusting water bath temperature and incurrent air pressure, we maintained relative humidity between 50  
147 and 70%, which is within the range of normal conditions at both sites during the breeding season.

148 Each individual was sampled at multiple temperatures as part of a concurrent study of thermal  
149 tolerance. We subsetted data for analysis by selecting the longest continuous period of resting behavior  
150 after chamber temperature had reached equilibrium for at least 30 minutes. Subject activity was monitored  
151 in real-time via an infrared security camera connected with an external LCD screen. If no period of  
152 complete rest greater than two minutes was observed, no data were analyzed for that temperature. We  
153 pooled measurements from 27, 30, and 33°C, which are within the thermoneutral zone of most passerines  
154 (McKechnie & Wolf 2004; McNab 2009) and selected the lowest measurement for each individual as  
155 RMR.

156 We corrected mass flow rates of humid air, and calculated CO<sub>2</sub> and H<sub>2</sub>O production using  
157 equations in Lighton (2008). Metabolic rate (W) was calculated as in Walsberg and Wolf (1995). CO<sub>2</sub>  
158 production was converted to metabolic energy using a respiratory quotient (RQ) value of 0.71, as  
159 suggested for post-absorptive, non-granivorous birds (Gessaman & Nagy 1988).

## 160 **Literature data**

161 We compiled basal metabolic rate (BMR) data from the literature, drawing primarily from four  
162 manuscripts that use large BMR datasets to investigate allometric and latitudinal variation in avian BMR  
163 (McKechnie & Wolf 2004; Wiersma *et al.* 2007; Londoño *et al.* 2015; Bech *et al.* 2016). Estimates of  
164 annual adult survival probability were compiled by searching the literature, and were greatly aided by  
165 manuscripts containing large literature (Martin 1995; Martin & Clobert 1996) and field (Scholer *et al.*  
166 2019) datasets. Where multiple estimates of either BMR or adult survival probability for a single species  
167 were present in the literature, we chose the estimate based on the most recent study.

## 168 **Statistical Analyses**

169 For our Malaysia and Arizona field data, we employed Cormack-Jolly-Seber models to estimate apparent  
170 annual adult survival ( $\phi$ ) and detection probability ( $p$ ) for each species based on live encounters in an

171 open population using program MARK (White & Burnham 1999; Burnham & Anderson 2002). A suite of  
172 models were built for each species, allowing parameters to vary based on sex and/or age-structure (time  
173 since marking; Pradel *et al.* 1997). Top models were selected based on Akaike's information criterion  
174 (AICc) adjusted for small sample size. Estimates used here are an updated subset of those presented in  
175 Martin *et al.* (Martin *et al.* 2015, 2017), where additional methodological details are provided. For our  
176 South Africa data, we similarly fit Cormack-Jolly-Seber models but survival was held constant and year  
177 was treated as a random effect. Estimates used here are from Lloyd *et al.* (2014).

178 We used simple linear regression to examine the expected allometric relationship between species  
179 mean body mass and metabolic rate for both field RMR and literature BMR datasets. We log-transformed  
180 RMR (W), BMR (W), and body mass (g).

181 We used phylogenetic path analysis (PPA) to examine the causal relationships between mass,  
182 metabolic rate, apparent adult survival, and latitude (Hardenberg & Gonzalez-Voyer 2013). PPA uses the  
183 d-separation method to test the plausibility that a causal model created the observed data and to compare  
184 the relative support of multiple models. We developed six possible models (Fig. 1) that varied in the  
185 depictions of how latitude and metabolic rate influence survival and how latitude influences metabolic  
186 rate. We tested the conditional independencies of each model using phylogenetic least-squares regression  
187 (PGLS), implemented in the package 'ape' (Paradis *et al.* 2004; Popescu *et al.* 2012). We then tested the  
188 plausibility of each causal model using Fisher's C statistic. We used the C statistic Information Criterion  
189 with a correction for small sample sizes (CICc) to rank and compute the probability of each causal model  
190 given the data and the candidate model set (CIC weight). We then used model averaging to estimate  
191 standardized path coefficients for all plausible models ( $p > 0.05$ ; Anderson *et al.* 2000; Hardenberg &  
192 Gonzalez-Voyer 2013). We log-transformed RMR (W), BMR (W), and body mass (g). We followed  
193 identical procedures for analysis of both our field RMR data and literature BMR data.

194 Phylogenetic trees were acquired from birdtree.org (Jetz *et al.* 2012) using the Hackett backbone  
195 (Hackett *et al.* 2008). We sampled a distribution of 1000 trees for each analysis and produced majority-  
196 rules consensus trees using Mesquite (Maddison & Maddison 2011). In one case (*Troglodytes aedon*), we



197 include both a tropical (*T. a. musculus*) and temperate (*T. a. aedon*) subspecies in our literature BMR  
198 dataset. To facilitate phylogenetic analysis in which duplicate estimates for a single species are  
199 problematic, we assigned one estimate to a closely related congener (*T. cobbi*) for tree construction.

200 Finally, we combined field and literature datasets and tested for differences in allometric  
201 relationships between RMR and BMR using a simple linear model. All analyses were performed in R (R  
202 Core Team 2015).

203

## 204 RESULTS

205 We obtained field-based estimates of adult mortality probability and resting metabolic rate for 47  
206 species; 14 in Arizona, 16 in Malaysia, and 17 in South Africa. We measured RMR in a total of 237  
207 individuals with an average of 5.0 individuals per species (Table 1). Body mass explained the majority of  
208 variation in metabolic rates ( $R^2 = 0.94$ ,  $P < 0.01$ , Fig. 2A). The allometric scaling exponent was 0.64,  
209 which is consistent with known values for birds (Bennett & Harvey 1987; McKechnie & Wolf 2004). The  
210 only plausible model that explained relationships was the full model (Fig. 1F) which described direct  
211 causal relationships between RMR and survival, latitude and survival, and latitude and RMR (Fig. 2C,  
212 3A). Adult survival declined with RMR, but was higher in tropical and south temperate species compared  
213 with north temperate relatives after accounting for RMR (Fig. 2C, 3A). RMR was slightly lower in  
214 tropical species, but higher in the south temperate when compared to north temperate species (Fig. 2C,  
215 3A).

216 Our compiled literature data for BMR and adult survival probability included 62 temperate, 64  
217 tropical, and 21 south temperate species (Supplementary Table 1). Similar to our field data, body mass  
218 explained extensive variation in metabolic rates ( $R^2 = 0.86$ ,  $P < 0.01$ , Fig 2B). The allometric scaling  
219 exponent was 0.66, nearly identical to our RMR estimate above. Four models could have plausibly  
220 created the observed BMR and survival data from the literature (Fig. 1, 3B). Among these, a direct effect  
221 of latitude on adult survival was strongly supported (CICc weight = 1.0). A negative relationship between  
222 BMR and survival also had some support (CICc weight = 0.505), as well as latitudinal differences in

223 BMR (CICc weight = 0.463). Adult survival declined with BMR and was higher in tropical and south  
224 temperate species than north temperate relatives after accounting for BMR (Fig. 2D, 3B). BMR was  
225 slightly lower in tropical and south temperate species than in north temperate species (Fig. 2D, 3B).

226 RMR was 14.7% higher than BMR ( $P < 0.01$ ), but the allometric relationship between mass and  
227 metabolism did not differ for (RMR) and basal (BMR) metabolic rates ( $P = 0.51$ , Fig. 7).

228

## 229 **DISCUSSION**

230 Broad tests of metabolism and annual survival probability across diverse species have been lacking,  
231 despite a long history of their possible association ((Pearl 1928; Harman 1956; Balaban *et al.* 2005; Brys  
232 *et al.* 2007; Monaghan *et al.* 2009) that has been challenged by cross-taxa comparisons (i.e., Holmes &  
233 Austad 1995; Holmes *et al.* 2001; Munshi-South & Wilkinson 2010). Our field data on RMR and those  
234 from the literature on BMR included 193 species across the world and yielded results that were largely in  
235 agreement between the two datasets. In particular, the results suggest that metabolic rate is associated  
236 with adult survival, but most of the variation in adult survival probability among latitudes is independent  
237 of metabolic rate (Fig. 2, 4). Our results provide some support for a possible role of the rate-of-living  
238 hypothesis within latitudes. However, more significantly, our results parallel those of comparisons across  
239 taxonomic groups (i.e., Holmes & Austad 1995; Holmes *et al.* 2001; Munshi-South & Wilkinson 2010) in  
240 suggesting that metabolic rate is not the primary driver of broader global patterns of survival probability.

241 We found that while metabolic rates were reduced in tropical compared with north temperate  
242 species, results were mixed when comparing south temperate to north temperate species (Fig. 2A-B, 3).  
243 Lower metabolism in tropical species fits with results of previous studies (Wiersma *et al.* 2007; Londoño  
244 *et al.* 2015). However, the difference in metabolism across latitudes is only a small, statistical difference  
245 (as also found by Wiersma *et al.* 2007, Fig 1; Londono *et al.* 2015), whereas adult survival probability  
246 shows a consistently large difference between the north temperate and tropical latitudes (Martin *et al.*  
247 2017). The small difference in metabolism and larger difference in survival fits with our results that much  
248 of the difference in survival probabilities between latitudes is not related to metabolism.

249           Consideration of metabolism and survival in south temperate regions has been limited (but see  
250   Bech *et al.* 2016). However, inclusion of this region provides critical additional insight. Our field dataset  
251   indicated higher resting metabolic rate in South African species compared with Arizona, but support for  
252   the significance of this relationship was relatively weak (Fig. 3A). Nonetheless, the resting metabolic  
253   rates do not fit the pace-of-life hypothesis given that the Southern African species have substantially  
254   higher survival rates than Arizona species (Peach *et al.* 2001; Lloyd *et al.* 2014). In contrast, BMR was  
255   reduced in south temperate compared with north temperate species based on literature data (Fig. 3B), and  
256   this relationship was strongly supported. The high survival rates of south temperate species (Lloyd *et al.*  
257   2014) taken together with their lower BMR rates then fits with the pace-of-life hypothesis (Wiersma *et al.*  
258   2007; Healy *et al.* 2019). This inconsistency between RMR and BMR together with earlier work in both  
259   adult birds (Vleck & Vleck 1979; Bennett & Harvey 1987) and embryos (Martin *et al.* 2013) that show no  
260   latitudinal difference in metabolism, suggests that metabolic rate is a minor influence on latitudinal  
261   variation in survival rates relative to other factors associated with latitude.

262           Latitudinal variation in avian mortality rates may be driven primarily by differences in extrinsic  
263   mortality probability. Extrinsic mortality is thought to account for 80-95% of all mortality for birds with  
264   total annual mortality rates similar to those in our study (Ricklefs 1998). Thus, variation in extrinsic  
265   mortality is likely to have a much larger effect on total mortality rates than intrinsic physiological  
266   differences. However, reduced metabolic costs to survival should be favored in populations with low  
267   extrinsic adult mortality, meaning extrinsic and intrinsic mortality rates should be correlated (reviewed in  
268   (Charlesworth 1994, 2000). Indeed, actuarial (Promislow 1991; Ricklefs 1998, 2000) and experimental  
269   (Stearns *et al.* 2000) studies across taxa suggest intrinsic mortality rate increases with extrinsic mortality  
270   rate (e.g. weather, predation). However, the proportion of deaths from intrinsic sources are greater when  
271   overall mortality rates are low, suggesting that adaptations to slow the rate of aging are limited, such that  
272   extrinsic and intrinsic rates may become increasingly decoupled as extrinsic mortality declines (Ricklefs  
273   & Scheuerlein 2001). Furthermore, the onset of senescence is commonly delayed until well after the age  
274   of maturity (Promislow 1991), suggesting that intrinsic and extrinsic mortality rates may also be unrelated

275 when extrinsic mortality is very high. Ultimately, high adult mortality rates in temperate birds may reflect  
276 high rates of extrinsic mortality imposed by abiotic factors (MacArthur 1972) that better explain  
277 latitudinal differences in survival (Martin 2002, 2015; Martin *et al.* 2015).

278         The absence of a strong relationship between metabolic rate and adult survival across latitudes  
279 does not discount the possibility that physiological damage from cellular metabolism contributes to adult  
280 survival rates and life-history tradeoffs. On the contrary, a causal relationship between metabolism and  
281 survival was supported (Fig. 3) and the predicted negative associations were observed within most  
282 regions using both RMR and BMR datasets. Moreover, increased investment in mechanisms to mitigate  
283 damage, such as endogenous production of antioxidants (Parolini *et al.* 2017) or mitochondrial membrane  
284 composition (Hulbert *et al.* 2007), can reduce damage from cellular metabolism. If tropical species invest  
285 in these mechanisms with allocation costs for growth or reproduction, such a tradeoff could explain the  
286 longer life and slower life-history strategies of tropical species despite broadly similar metabolic rates  
287 across latitudes. Yet, ultimately, investment in such mechanisms only makes sense if extrinsic mortality is  
288 low.

289         BMR and RMR are the most easily measured and comparable metrics of energy expenditure in  
290 wild organisms. However, these measures only encompass minimal energy expenditure to sustain life and  
291 thus exclude energy allocated to essential activities such as reproduction, thermoregulation, locomotion  
292 and digestion. Physiological damage from metabolism may be more tightly linked to measures of total  
293 energy expenditure that describe all energetic expenditures in free-living organisms. Measurements of  
294 total energy expenditure, such as field metabolic rate (FMR) or daily energy expenditure (DEE) are  
295 comparatively rare in the literature, especially for tropical species (McKechnie 2015), but do show a  
296 relationship with adult survival probability in the temperate zone (Martin 2014). BMR and RMR are  
297 strongly correlated with each other (Fig. 4), and with measures of total energy expenditure across species  
298 (Daan *et al.* 1990; Auer *et al.* 2017), making BMR and RMR reasonable but imperfect proxies for total  
299 energy expenditure. Future studies should examine the relationship between FMR and adult survival  
300 within and across latitudes.

301 Our study provides support for some role for the rate-of-living hypothesis within latitudes while  
302 also suggesting that it is only explains a small amount of the variation in survival within latitudes and is  
303 unable to explain differences between latitudes. This contradiction provides obvious opportunity for  
304 future studies. South temperate and tropical birds have longer developmental periods and parents invest  
305 more energy per-offspring compared with temperate species (Martin 1996, 2015; Martin *et al.* 2011; Gill  
306 & Haggerty 2012). These differences may facilitate longer life in tropical species if they facilitate greater  
307 investment in physiological adaptations to combat oxidative damage in the face of similar metabolic rates.  
308 Quantifying interspecific and latitudinal variation in physiological mechanisms capable of mitigating  
309 oxidative damage may reveal how tropical and south temperate species maintain low adult mortality  
310 without a major reduction in basal metabolic rate. Mortality rate differences among latitudes may also be  
311 due to variation in extrinsic mortality but quantifying latitudinal differences in cause-specific mortality  
312 are necessary to test this hypothesis. Overall, our results suggest an urgent need to carefully examine  
313 alternative physiological and ecological mechanisms shaping global variation in demographic rates and  
314 life histories.

315

## 316 **ACKNOWLEDGMENTS**

317 We are grateful to Adam Mitchell and Riccardo Ton for comments that improved the manuscript. We  
318 would like to thank Alim Biun, Dr. Maklarin Lakim, Rimi Repin and Fred Tuh from Sabah Parks, and  
319 C.Y. Chung from the Sabah Biodiversity Centre for assistance in Malaysia. AJB would also like to thank  
320 Bonifatreno Jurunin, Enroe bin Soudi, Rayner Ray, Ed Conrad and William Talbot for invaluable  
321 assistance in the field. This work was supported by National Geographic Society (9875-16) and the  
322 National Science Foundation (DEB-1241041, DEB-1651283 & IOS-1656120) to TEM, an AOU  
323 Graduate Student Research Grant and a Wesley M. Dixon Memorial Fellowship to AJB. This work was  
324 performed under the auspices of University of Montana IACUC protocol #059-10TMMCWRU. Any use  
325 of trade, firm, or product names is for descriptive purposes only and does not imply endorsement by the  
326 U.S. Government.

327 **REFERENCES**

- 328 Anderson, D.R., Burnham, K.P. & Thompson, W.L. (2000). Null hypothesis testing: Problems,  
329 prevalence, and an alternative. *J. Wildl. Manage.*, 64, 912–923.
- 330 Ashmole, N.P. (1963). The regulation of numbers of tropical oceanic birds. *Ibis*, 103b, 458–473.
- 331 Auer, S.K., Killen, S.S. & Rezende, E.L. (2017). Resting vs. active: A meta-analysis of the intra- and  
332 inter-specific associations between minimum, sustained, and maximum metabolic rates in  
333 vertebrates. *Funct. Ecol.*, 31, 1728–1738.
- 334 Balaban, R.S., Nemoto, S. & Finkel, T. (2005). Mitochondria, oxidants, and aging. *Cell*, 120, 483–495.
- 335 Bech, C., Chappell, M.A., Astheimer, L.B., Londoño, G.A. & Buttemer, W.A. (2016). A ‘slow pace of  
336 life’ in Australian old □ endemic passerine birds is not accompanied by low basal metabolic rates. *J.*  
337 *Comp. Physiol. B*, 186, 503–512.
- 338 Bennett, P.M. & Harvey, P.H. (1987). Active and resting metabolism in birds: allometry, phylogeny and  
339 ecology. *J. Zool.*, 213, 327–344.
- 340 Brand, M. (2000). Uncoupling to survive? The role of mitochondrial inefficiency in ageing. *Exp.*  
341 *Gerontol.*, 35, 811–820.
- 342 Brys, K., Vanfleteren, J.R. & Braeckman, B.P. (2007). Testing the rate-of-living/oxidative damage theory  
343 of aging in the nematode model *Caenorhabditis elegans*. *Exp. Gerontol.*, 42, 845–851.
- 344 Burnham, K.P. & Anderson, D. (2002). *Model selection and multimodal inference: A practical*  
345 *information-theoretic approach*. Springer-Verlag, New York, NY.
- 346 Charlesworth, B. (1994). *Evolution in age-structured populations*. Cambridge University Press, New  
347 York, NY.
- 348 Charlesworth, B. (2000). Fisher, Medawar, Hamilton and the evolution of aging. *Genetics*, 156, 927–931.
- 349 Costantini, D. (2008). Oxidative stress in ecology and evolution: Lessons from avian studies. *Ecol. Lett.*,  
350 11, 1238–1251.
- 351 Daan, S., Masman, D. & Groenewold, A. (1990). Avian basal metabolic rates: their association with body  
352 composition and energy expenditure in nature. *Am. Physiol. Soc.*, 333–340.

- 353 Gerson, A.R., Smith, E.K., Smit, B., Mckechnie, A.E. & Wolf, B.O. (2015). The impact of humidity on  
354 evaporative cooling in small desert birds exposed to high air temperatures. *Physiol. Biochem. Zool.*,  
355 87, 782–795.
- 356 Gessaman, J.A. & Nagy, K.A. (1988). Energy metabolism: errors in gas-exchange conversion factors.  
357 *Physiol. Zool.*, 61, 507–513.
- 358 Gill, S.A. & Haggerty, T.M. (2012). A comparison of life-history and parental care in temperate and  
359 tropical wrens. *J. Avian Biol.*, 43, 461–471.
- 360 Hackett, S.J., Kimball, R.T., Reddy, S., Bowie, R.C.K., Braun, E.L., Braun, M.J., *et al.* (2008). A  
361 phylogenomic study of birds reveals their evolutionary history. *Science.*, 320, 1763–1768.
- 362 Hardenberg, A. von & Gonzalez-Voyer, A. (2013). Disentangling evolutionary cause-effect relationships  
363 with phylogenetic confirmatory path analysis. *Evolution*, 67, 378–387.
- 364 Harman, D. (1956). Aging: a theory based on free radical and radiation chemistry. *J. Gerontol.*, 11, 298–  
365 300.
- 366 Healy, K., Ezard, T.H.G., Jones, O.R., Salguero-Gómez, R. & Buckley, Y.M. (2019). Animal life history  
367 is shaped by the pace of life and the distribution of age-specific mortality and reproduction. *Nat.*  
368 *Ecol. Evol.*
- 369 Holmes, D.J., Fluckiger, R. & Austad, S.N. (2001). Comparative biology of aging in birds: An update.  
370 *Exp. Gerontol.*, 36, 869–883.
- 371 Holmes, J. & Austad, N. (1995). The evolution of avian senescence patterns: Implications processes  
372 primary understanding aging. *Amer Zool*, 317, 307–317.
- 373 del Hoyo, J., Elliot, A., Sargatal, J., Christie, D.A. & de Juana, E. (Eds.). (2017). *Handbook of birds of the*  
374 *world*. Lynx Edicions, Barcelona.
- 375 Hulbert, A.J., Pamplona, R., Buffenstein, R. & Buttemer, W.A. (2007). Life and death: metabolic rate,  
376 membrane composition, and life span of animals. *Physiol. Rev.*, 87, 1175–1213.
- 377 Jetz, W., Thomas, G.H., Joy, J.B., Hartmann, K. & Mooers, A.O. (2012). The global diversity of birds in  
378 space and time. *Nature*, 491, 444–448.

- 379 Johnston, J.P., Peach, W.J., Gregory, R.D. & White, S.A. (1997). Survival rates of tropical and temperate  
380 passerines: a Trinidadian perspective. *Am. Nat.*, 150, 771–789.
- 381 Krementz, D.G., Sauer, J.R. & Nichols, J.D. (1989). Model-based estimates of annual survival rate are  
382 preferable to observed maximum lifespan statistics for use in comparative life-history studies.  
383 *Oikos*, 56, 203–208.
- 384 Lighton, J.R.B. (2008). *Measuring metabolic rates: A manual for scientists*. Oxford University Press,  
385 New York.
- 386 Lloyd, P., Abadi, F., Altwegg, R. & Martin, T.E. (2014). South temperate birds have higher apparent  
387 adult survival than tropical birds in Africa. *J. Avian Biol.*, 45, 493–500.
- 388 Londoño, G.A., Chappell, M.A., Casta, R., Jankowski, J.E. & Robinson, S.K. (2015). Basal metabolism  
389 in tropical birds: latitude, altitude, and the “pace of life.” *Funct. Ecol.*, 29, 338–346.
- 390 MacArthur, R.H. (1972). *Geographical ecology*. Princeton University Press, Princeton, NJ.
- 391 Maddison, W.P. & Maddison, D.R. (2011). Mesquite: a modular system for evolutionary analysis.  
392 Version 2.75.
- 393 de Magalhães, J.P. & Costa, J. (2009). A database of vertebrate longevity records and their relation to  
394 other life-history traits. *J. Evol. Biol.*, 22, 1770–1774.
- 395 Martin, T.E. (1995). Avian life history evolution in relation to nest sites, nest predation, and food. *Ecol.*  
396 *Monogr.*, 65, 101–127.
- 397 Martin, T.E. (1996). Life history evolution in tropical and south temperate birds: What do we really  
398 know? *J. Avian Biol.*, 27, 263–272.
- 399 Martin, T.E. (2002). A new view of avian life-history evolution tested on an incubation paradox. *Proc.*  
400 *Natl. Acad. Sci.*, 269, 309–316.
- 401 Martin, T.E. (2014). A conceptual framework for clutch-size evolution in songbirds. *Am. Nat.*, 183, 313–  
402 324.
- 403 Martin, T.E. (2015). Age-related mortality explains life history strategies of tropical and temperate  
404 songbirds. *Science*, 349, 966–970.



- 405 Martin, T.E. & Clobert, J. (1996). Nest predation and avian life-history evolution in Europe versus North  
406 America: A possible role of humans? *Am. Nat.*, 147, 1028–1046.
- 407 Martin, T.E., Lloyd, P., Bosque, C., Barton, D.C., Biancucci, A.L., Cheng, Y.-R., *et al.* (2011). Growth  
408 rate variation among Passerine species in tropical and temperate sites: an antagonistic interaction  
409 between parental food provisioning and nest predation risk. *Evolution*, 65, 1607–1622.
- 410 Martin, T.E., Oteyza, J.C., Boyce, A.J., Lloyd, P. & Ton, R. (2015). Adult mortality probability and nest  
411 predation rates explain parental effort in warming eggs with consequences for embryonic  
412 development time. *Am. Nat.*, 186, 223–236.
- 413 Martin, T.E., Riordan, M.M., Repin, R., Mouton, J.C. & Blake, W.M. (2017). Apparent annual survival  
414 estimates of tropical songbirds better reflect life history variation when based on intensive field  
415 methods. *Glob. Ecol. Biogeogr.*, 26, 1386–1397.
- 416 Martin, T.E., Ton, R. & Niklison, A.M. (2013). Intrinsic versus extrinsic influences on life history  
417 expression: metabolism and parentally-induced temperature influences on embryo development rate.  
418 *Ecol. Lett.*, 16, 738–745.
- 419 McKechnie, A.E. (2015). Global variation in avian metabolic rates and the slow pace of life of tropical  
420 birds. *Funct. Ecol.*, 29, 297–298.
- 421 McKechnie, A.E. & Wolf, B.O. (2004). The allometry of avian basal metabolic rate: Good predictions  
422 need good data. *Physiol. Biochem. Zool.*, 77, 502–521.
- 423 McNab, B.K. (2009). Ecological factors affect the level and scaling of avian BMR. *Comp. Biochem.*  
424 *Physiol. Part A*, 152, 22–45.
- 425 Monaghan, P. & Haussmann, M.F. (2006). Do telomere dynamics link lifestyle and lifespan? *Trends*  
426 *Ecol. Evol.*, 21, 47–53.
- 427 Monaghan, P., Metcalfe, N.B. & Torres, R. (2009). Oxidative stress as a mediator of life history trade-  
428 offs: Mechanisms, measurements and interpretation. *Ecol. Lett.*, 12, 75–92.
- 429 Munshi-South, J. & Wilkinson, G.S. (2010). Bats and birds: exceptional longevity despite high metabolic  
430 rates. *Ageing Res. Rev.*, 9, 12–19.

- 431 Paradis, E., Claude, J. & Strimmer, K. (2004). APE: Analyses of phylogenetics and evolution in R  
432 language. *Bioinformatics*, 20, 289–290.
- 433 Parolini, M., Khoriauli, L., Daniela, C., Colombo, G., Caprioli, M., Santagostino, M., *et al.* (2017). Yolk  
434 vitamin E prevents oxidative damage in gull hatchlings. *R. Soc. Open Sci.*, 4, 170098.
- 435 Pearl, R. (1928). *The rate of living*. Alfred A Knopf, New York.
- 436 Popescu, A.A., Huber, K.T. & Paradis, E. (2012). Ape 3.0: New tools for distance-based phylogenetics  
437 and evolutionary analysis in R. *Bioinformatics*, 28, 1536–1537.
- 438 Pradel, R., Hines, J.E., Lebreton, J.-D. & Nichols, J.D. (1997). Capture-recapture survival models taking  
439 account of transients. *Biometrics*, 53, 60–72.
- 440 Promislow, D.E.L. (1991). Senescence in natural populations of mammals: a comparative study.  
441 *Evolution*, 45, 1869–1887.
- 442 Promislow, D.E.L. (1993). On size and survival: Progress and pitfalls in the allometry of life span. *J.*  
443 *Gerontol.*, 48, B115–B123.
- 444 Promislow, D.E.L. & Harvey, P.H. (1990). Living fast and dying young: A comparative analysis of life-  
445 history variation among mammals. *J. Zool.*, 220, 417–437.
- 446 R Core Team. (2015). R: a language and environment for statistical computing.
- 447 Ricklefs, R.E. (1998). Evolutionary theories of aging: Confirmation of a fundamental prediction, with  
448 implications for the genetic basis and evolution of life span. *Am. Nat.*, 152, 24–44.
- 449 Ricklefs, R.E. (2000). Intrinsic aging-related mortality in birds. *J. Avian Biol.*, 31, 103–111.
- 450 Ricklefs, R.E. & Scheuerlein, A. (2001). Comparison of aging-related mortality among birds and  
451 mammals. *Exp. Gerontol.*, 36, 845–857.
- 452 Salin, K., Auer, S.K., Rudolf, A.M., Anderson, G.J., Cairns, A.G., Mullen, W., *et al.* (2015). Individuals  
453 with higher metabolic rates have lower levels of reactive oxygen species in vivo. *Biol. Lett.*, 11,  
454 20150538.
- 455 Sandercock, B.K., Beissinger, S.R., Stoleson, S.H., Melland, R.R. & Hughes, C.R. (2000). Survival rates  
456 of a neotropical parrot: implications for latitudinal comparisons of avian demography. *Ecology*, 81,

- 457 1351–1370.
- 458 Scholer, M.N., Arcese, P., Puterman, M.L., Londoño, G.A. & Jankowski, J.E. (2019). Survival is  
459 negatively related to basal metabolic rate in tropical Andean birds. *Funct. Ecol.*, 1365-2435.13375.
- 460 Skrip, M.M. & McWilliams, S.R. (2016). Oxidative balance in birds: an atoms-to-organisms-to-ecology  
461 primer for ornithologists. *J. Field Ornithol.*, 87, 1–20.
- 462 Speakman, J.R. (2005). Correlations between physiology and lifespan - Two widely ignored problems  
463 with comparative studies. *Aging Cell*, 4, 167–175.
- 464 Stearns, S.C. (1977). The evolution of life history traits: A critique of the theory and a review of the data.  
465 *Annu. Rev. Ecol. Syst.*, 8, 145–171.
- 466 Stearns, S.C., Ackermann, M., Doebeli, M. & Kaiser, M. (2000). Experimental evolution of aging,  
467 growth, and reproduction in fruitflies. *Proc. Natl. Acad. Sci.*, 97, 3309–3313.
- 468 Trevelyan, R., Harvey, P.H. & Pagel, M.D. (1990). Metabolic rates and life histories in birds. *Funct.*  
469 *Ecol.*, 4, 135–141.
- 470 Vagasi, C.I., Vincze, O., Laura, P., Osvath, G., Penzes, J., Haussmann, M.F., *et al.* (2018). Longevity and  
471 life history coevolve with oxidative stress in birds. *Funct. Ecol.*, 10.1111/1365-2435.13228.
- 472 Vleck, C.M. & Vleck, D. (1979). Metabolic rate in five tropical bird species. *Condor*, 81, 89–91.
- 473 Walsberg, G. & Wolf, B. (1995). Variation in the respiratory quotient of birds and implications for  
474 indirect calorimetry using measurements of carbon dioxide production. *J. Exp. Biol.*, 198, 213–219.
- 475 White, G.C. & Burnham, K.P. (1999). Program MARK $\square$ : survival estimation from populations of  
476 marked animals. *Bird Study*, 46, S120–S139.
- 477 Wiersma, P., Munoz-Garcia, A., Walker, A. & Williams, J.B. (2007). Tropical birds have a slow pace of  
478 life. *Proc. Natl. Acad. Sci.*, 104, 9340–9345.
- 479 Wikelski, M., Spinney, L., Schelsky, W., Scheuerlein, A. & Gwinner, E. (2003). Slow pace of life in  
480 tropical sedentary birds: a common-garden experiment on four stonechat populations from different  
481 latitudes. *Proc. R. Soc. B*, 270, 2383–2388.
- 482 Williams, J.B., Miller, R.A., Harper, J.M. & Wiersma, P. (2010). Functional linkages for the pace of life,

483 life-history, and environment in birds. *Integr. Comp. Biol.*, 50, 855–868.

484

485 **Table 1.** Mean ( $\pm$  SE) values of mass, resting metabolic rate (RMR) and annual mortality probability for species in our field studies. N (sample  
 486 size) values represent the number of unique individuals measured for metabolic rate and the number of unique individuals marked for annual  
 487 mortality probability.

| Species                        | Metabolism |      |         | Survival Probability |   |                          |       |       |  |
|--------------------------------|------------|------|---------|----------------------|---|--------------------------|-------|-------|--|
|                                | Mass (g)   | SE   | RMR (W) | SE                   | N | Rate (Yr <sup>-1</sup> ) | SE    | N     |  |
| <b>Arizona</b>                 |            |      |         |                      |   |                          |       |       |  |
| <i>Empidonax occidentalis</i>  | 11.72      | 0.34 | 0.277   | 0.019                | 5 | 0.601                    | 0.034 | 674   |  |
| <i>Parus gambeli</i>           | 11.65      | 0.16 | 0.326   | 0.019                | 5 | 0.511                    | 0.033 | 709   |  |
| <i>Certhia americana</i>       | 7.47       | 0.26 | 0.227   | 0.011                | 4 | 0.549                    | 0.072 | 408   |  |
| <i>Sitta canadensis</i>        | 10.38      | 0.24 | 0.291   | 0.015                | 6 | 0.472                    | 0.058 | 547   |  |
| <i>Sitta carolinensis</i>      | 17.67      | 0.34 | 0.41    | 0.019                | 4 | 0.426                    | 0.057 | 164   |  |
| <i>Sialia mexicana</i>         | 23.68      | 0.55 | 0.44    | 0.017                | 3 | 0.477                    | 0.096 | 73    |  |
| <i>Catharus guttatus</i>       | 29.07      | 0.39 | 0.571   | 0.01                 | 7 | 0.535                    | 0.023 | 1,875 |  |
| <i>Turdus migratorius</i>      | 73.11      | 2.75 | 0.944   | 0.111                | 3 | 0.519                    | 0.035 | 655   |  |
| <i>Pipilo chlorurus</i>        | 30.25      | 0.75 | 0.575   | 0.025                | 6 | 0.56                     | 0.088 | 158   |  |
| <i>Junco hyemalis</i>          | 21.99      | 1.14 | 0.448   | 0.01                 | 7 | 0.57                     | 0.014 | 1,885 |  |
| <i>Vermivora celata</i>        | 8.98       | 0.17 | 0.267   | 0.013                | 7 | 0.565                    | 0.027 | 976   |  |
| <i>Dendroica coronata</i>      | 12.67      | 0.21 | 0.345   | 0.028                | 8 | 0.551                    | 0.038 | 1,008 |  |
| <i>Cardellina rubrifrons</i>   | 9.99       | 0.63 | 0.266   | 0.015                | 6 | 0.587                    | 0.051 | 694   |  |
| <i>Piranga ludoviciana</i>     | 28.3       | 0.71 | 0.512   | 0.023                | 5 | 0.615                    | 0.035 | 728   |  |
| <b>Malaysia</b>                |            |      |         |                      |   |                          |       |       |  |
| <i>Pachycephala hypoxantha</i> | 22.99      | 0.43 | 0.399   | 0.007                | 7 | 0.76                     | .029  | 309   |  |
| <i>Rhipidura albicollis</i>    | 12.18      | 0.15 | 0.309   | 0.008                | 8 | 0.654                    | .043  | 230   |  |
| <i>Alophoixus ochraceus</i>    | 49.12      | 1.3  | 0.76    | 0.032                | 9 | 0.817                    | .037  | 111   |  |
| <i>Orthotomus cuculatus</i>    | 7.13       | 0.15 | 0.225   | 0.012                | 5 | 0.676                    | .067  | 77    |  |
| <i>Urosphena whiteheadi</i>    | 10.4       | 0.17 | 0.299   | 0.012                | 6 | 0.717                    | .069  | 66    |  |
| <i>Yuhina everetti</i>         | 13.81      | 0.23 | 0.365   | 0.002                | 2 | 0.751                    | .019  | 459   |  |

|                               |        |      |       |       |   |       |      |     |
|-------------------------------|--------|------|-------|-------|---|-------|------|-----|
| <i>Zosterops atricapilla</i>  | 8.49   | 0.15 | 0.235 | 0.017 | 7 | 0.759 | .053 | 319 |
| <i>Stachyris nigriceps</i>    | 15.67  | 0.56 | 0.344 | 0.023 | 7 | 0.749 | .014 | 607 |
| <i>Trichastoma pyrrogenys</i> | 18.97  | 0.4  | 0.392 | 0.011 | 5 | 0.849 | .032 | 118 |
| <i>Napothera crassa</i>       | 27.79  | 0.69 | 0.459 | 0.03  | 4 | 0.849 | .025 | 103 |
| <i>Rhinomyias gularis</i>     | 25.58  | 0.46 | 0.461 | 0.035 | 6 | 0.853 | .023 | 171 |
| <i>Brachypteryx montana</i>   | 20.27  | -    | 0.448 | -     | 1 | 0.835 | .047 | 96  |
| <i>Enicurus leschenaulti</i>  | 35.69  | -    | 0.609 | -     | 1 | 0.81  | .065 | 38  |
| <i>Myophonus borneensis</i>   | 116.25 | 4.66 | 1.411 | 0.109 | 4 | 0.822 | .061 | 43  |
| <i>Ficedula hyperythra</i>    | 8.44   | 0.19 | 0.23  | 0.011 | 5 | 0.658 | .027 | 207 |
| <i>Aethopyga siparaja</i>     | 6.01   | 0.77 | 0.176 | 0.019 | 2 | 0.766 | .079 | 46  |

South Africa

|                                 |       |      |       |       |   |       |      |     |
|---------------------------------|-------|------|-------|-------|---|-------|------|-----|
| <i>Cossypha caffra</i>          | 29.99 | 1.01 | 0.653 | 0.043 | 6 | 0.903 | 0.02 | 83  |
| <i>Erythropygia coryphaeus</i>  | 21    | 0.47 | 0.402 | 0.019 | 6 | 0.777 | 0.02 | 364 |
| <i>Pycnonotus capensis</i>      | 34.36 | 1.28 | 0.786 | 0.035 | 7 | 0.786 | 0.04 | 45  |
| <i>Prinia maculosa</i>          | 9.19  | 0.23 | 0.338 | 0.036 | 6 | 0.706 | 0.02 | 212 |
| <i>Apalis thoracica</i>         | 11.49 | 0.07 | 0.307 | 0.006 | 7 | 0.764 | 0.02 | 134 |
| <i>Zosterops pallidus</i>       | 10.87 | 0.22 | 0.407 | 0.048 | 5 | 0.742 | 0.04 | 41  |
| <i>Sphenoeacus afer</i>         | 28.05 | 1.41 | 0.474 | 0.02  | 3 | 0.838 | 0.05 | 21  |
| <i>Sylvietta rufescens</i>      | 11.57 | 0.36 | 0.327 | 0.022 | 6 | 0.788 | 0.04 | 41  |
| <i>Sylvia subcaerulea</i>       | 13.20 | 0.34 | 0.374 | 0.018 | 4 | 0.810 | 0.03 | 62  |
| <i>Serinus flaviventris</i>     | 16.05 | 0.39 | 0.399 | 0.044 | 6 | 0.596 | 0.04 | 95  |
| <i>Serinus albogularis</i>      | 30.50 | 1.41 | 0.640 | 0.013 | 4 | 0.670 | 0.07 | 24  |
| <i>Emberiza capensis</i>        | 19.90 | 0.31 | 0.469 | 0.023 | 6 | 0.623 | 0.07 | 25  |
| <i>Colius colius</i>            | 45.21 | 1.19 | 0.725 | 0.069 | 6 | 0.721 | 0.08 | 62  |
| <i>Telophorus zeylonus</i>      | 67.65 | -    | 1.138 | -     | 1 | 0.785 | 0.07 | 13  |
| <i>Cisticola subruficapilla</i> | 10.15 | -    | 0.298 | -     | 1 | 0.629 | 0.05 | 54  |
| <i>Anthoscopus minutus</i>      | 6.90  | 0.24 | 0.223 | 0.009 | 3 | 0.337 | 0.06 | 53  |
| <i>Nectarinia chalybea</i>      | 8.08  | 0.2  | 0.298 | 0.031 | 5 | 0.794 | 0.03 | 55  |

489 **Figure Legends**

490 **Figure 1.** Our candidate model set (A-F) for phylogenetic path analysis. Models visually describe  
491 possible causal relationships between body mass, metabolic rate, survival probability and site/region.  
492 Metabolic rate is resting metabolic rate (RMR) for field studies and basal metabolic rate (BMR) for  
493 literature data.

494  
495 **Figure 2.** Allometric scaling of resting metabolic rate (A) and basal metabolic rate (B) and body mass for  
496 our field and literature datasets. The relationship between resting (C) and basal (D) metabolic rate and  
497 adult survival for species in our field and literature datasets. Both variables are residual values controlled  
498 for body mass. Each point represents mean values for an individual species. Throughout the plots, north  
499 temperate species are in black, tropical species in yellow and south temperate species in blue.

500  
501 **Figure 3.** Visual and tabular representation of the causal relationships between body mass, latitude,  
502 metabolic rate and adult survival probability for our field and literature datasets. Blue lines represent  
503 positive relationships and negative relationships are in red. Arrows point in the direction of causality  
504 (from cause to effect). The width of each arrow is proportional to the effect size in number of standard  
505 deviations in variation explained according to weighted model averaging. Arrows are only present for  
506 relationships present in a subset of plausible models. Bolded models in  $CIC_c$  tables are those which are  
507 plausible given the data ( $\alpha = 0.05$ ).

508  
509 **Figure 4.** Allometric scaling relationships of RMR and BMR. Each point represents individual species-  
510 mean values for body mass and metabolic rate. RMR measurements are in yellow, BMR points are in  
511 black.

512 Fig 1

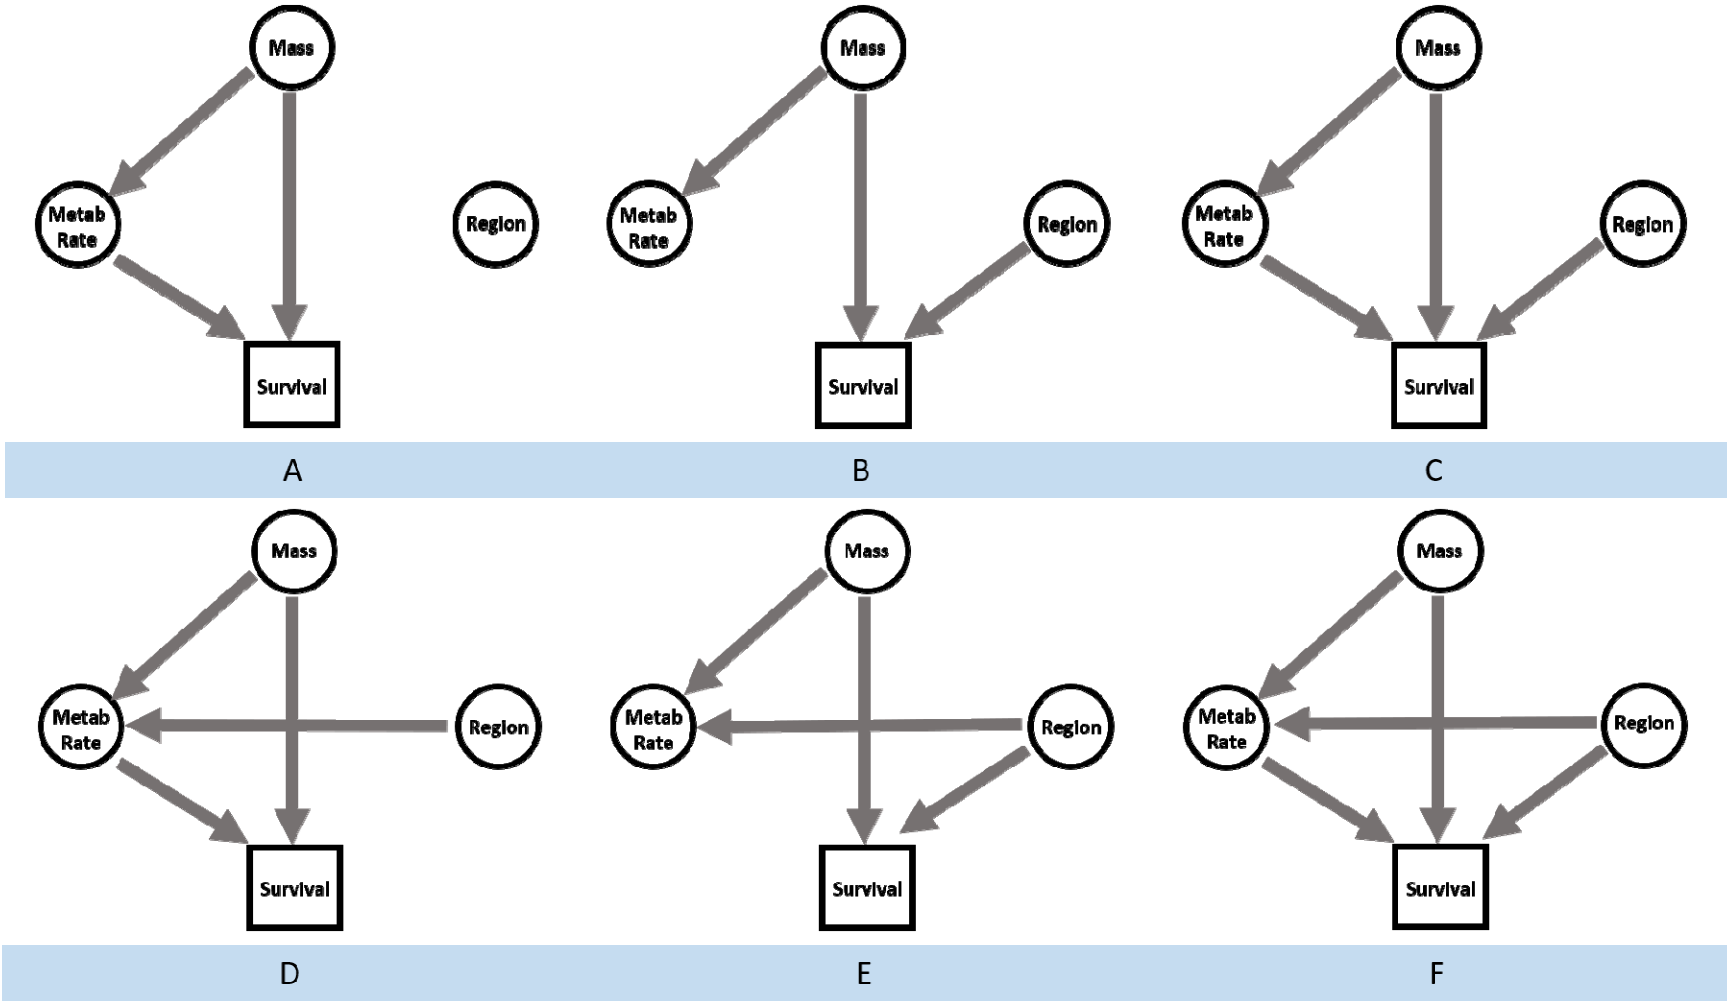

513



Fig 2

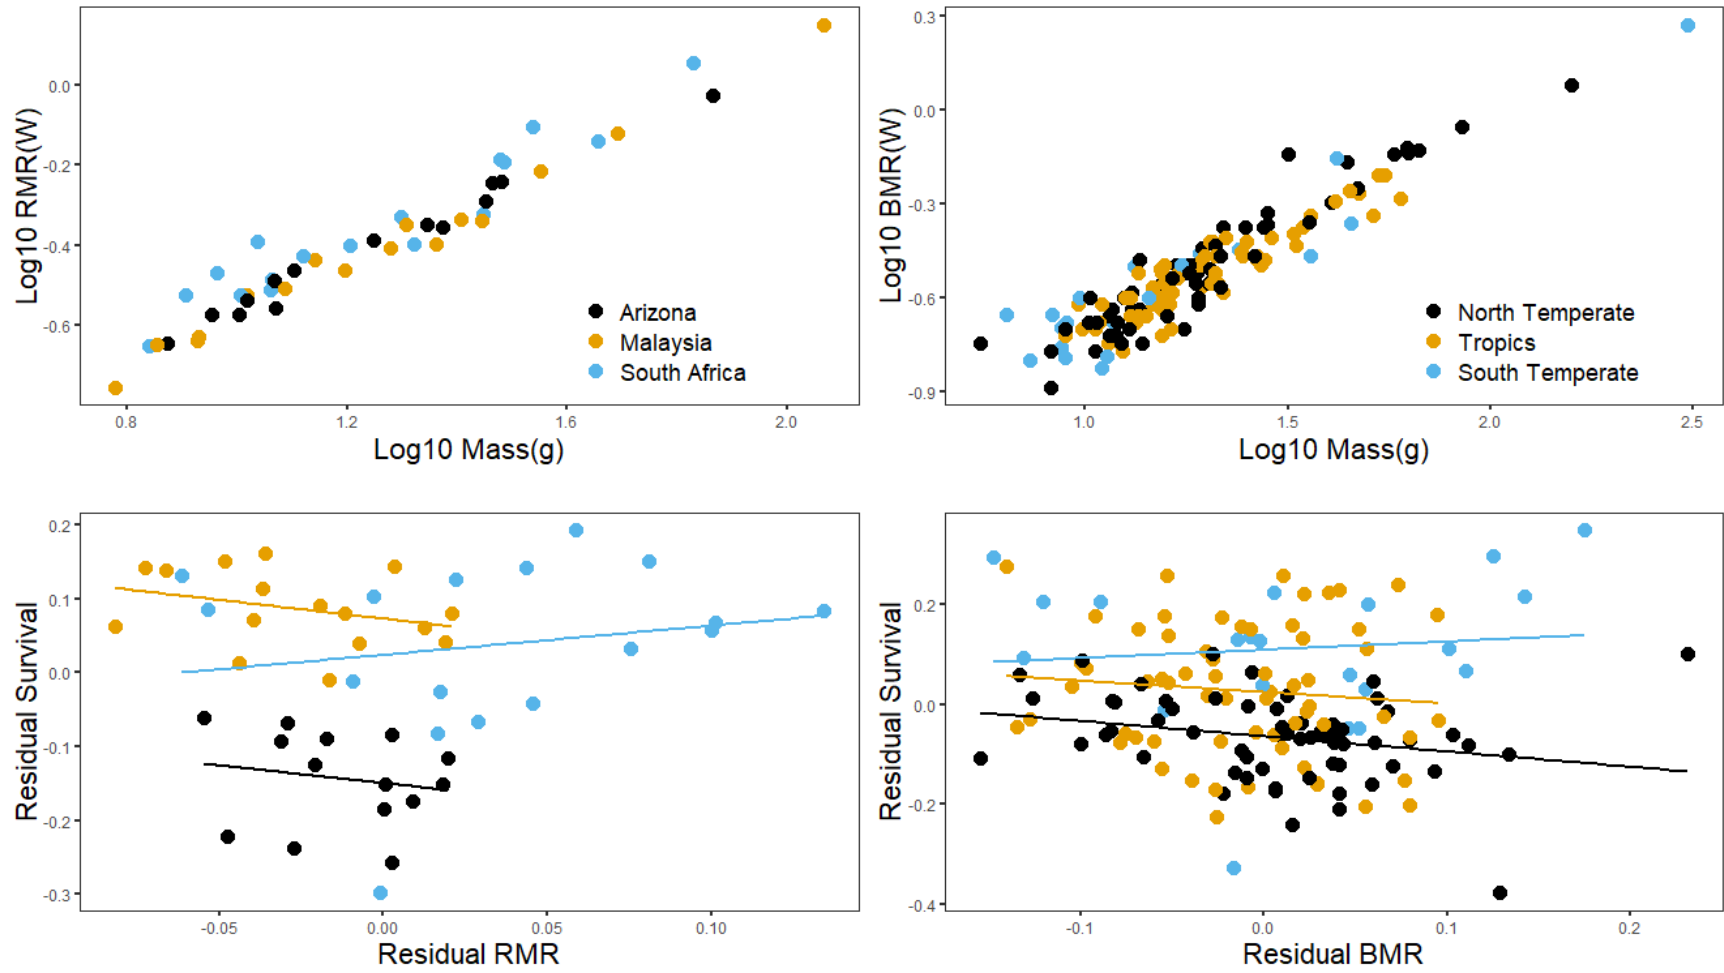

Fig 3

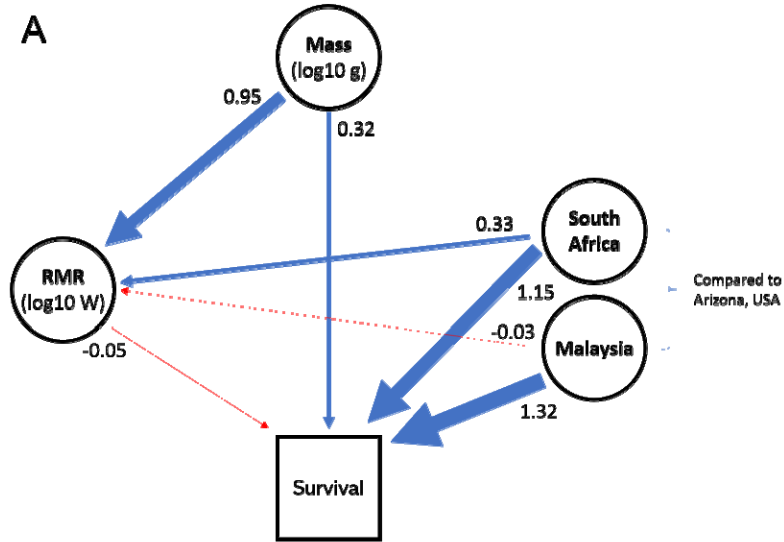

| Model | k | C            | p            | CIC <sub>c</sub> | Δ CIC <sub>c</sub> | weight       |
|-------|---|--------------|--------------|------------------|--------------------|--------------|
| F     | 1 | <b>0.059</b> | <b>0.971</b> | <b>22.924</b>    | <b>0</b>           | <b>0.999</b> |
| D     | 2 | 18.102       | 0.001        | 37.891           | 14.968             | 0.001        |
| E     | 2 | 18.102       | 0.001        | 37.891           | 14.968             | 0.001        |
| B     | 3 | 25.864       | <0.001       | 42.735           | 19.812             | 0            |
| C     | 2 | 25.49        | <0.001       | 45.279           | 22.355             | 0            |
| A     | 3 | 43.533       | <0.001       | 60.404           | 37.481             | 0            |

| Relationship    | Σ weight |
|-----------------|----------|
| RMR → Survival  | 0.999    |
| Site → Survival | 0.999    |
| Site → RMR      | 0.999    |

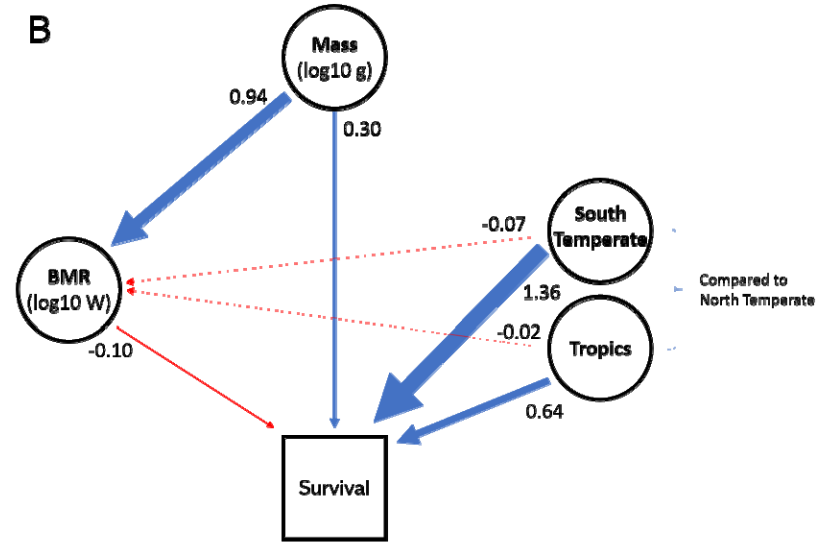

| Model | k | C      | p      | CIC <sub>c</sub> | Δ CIC <sub>c</sub> | weight       |
|-------|---|--------|--------|------------------|--------------------|--------------|
| C     | 2 | 2.655  | 0.617  | 19.698           | <b>0</b>           | <b>0.272</b> |
| B     | 3 | 4.946  | 0.551  | 19.751           | 0.053              | 0.265        |
| F     | 1 | 0.694  | 0.707  | 20.008           | 0.309              | 0.233        |
| E     | 2 | 2.985  | 0.56   | 20.028           | 0.33               | 0.23         |
| A     | 3 | 32.66  | <0.001 | 47.465           | 27.767             | 0            |
| D     | 2 | 30.699 | <0.001 | 47.742           | 28.044             | 0            |

| Relationship        | Σ weight |
|---------------------|----------|
| BMR → Survival      | 0.505    |
| Latitude → Survival | 1        |
| Latitude → BMR      | 0.463    |

**Fig 4**

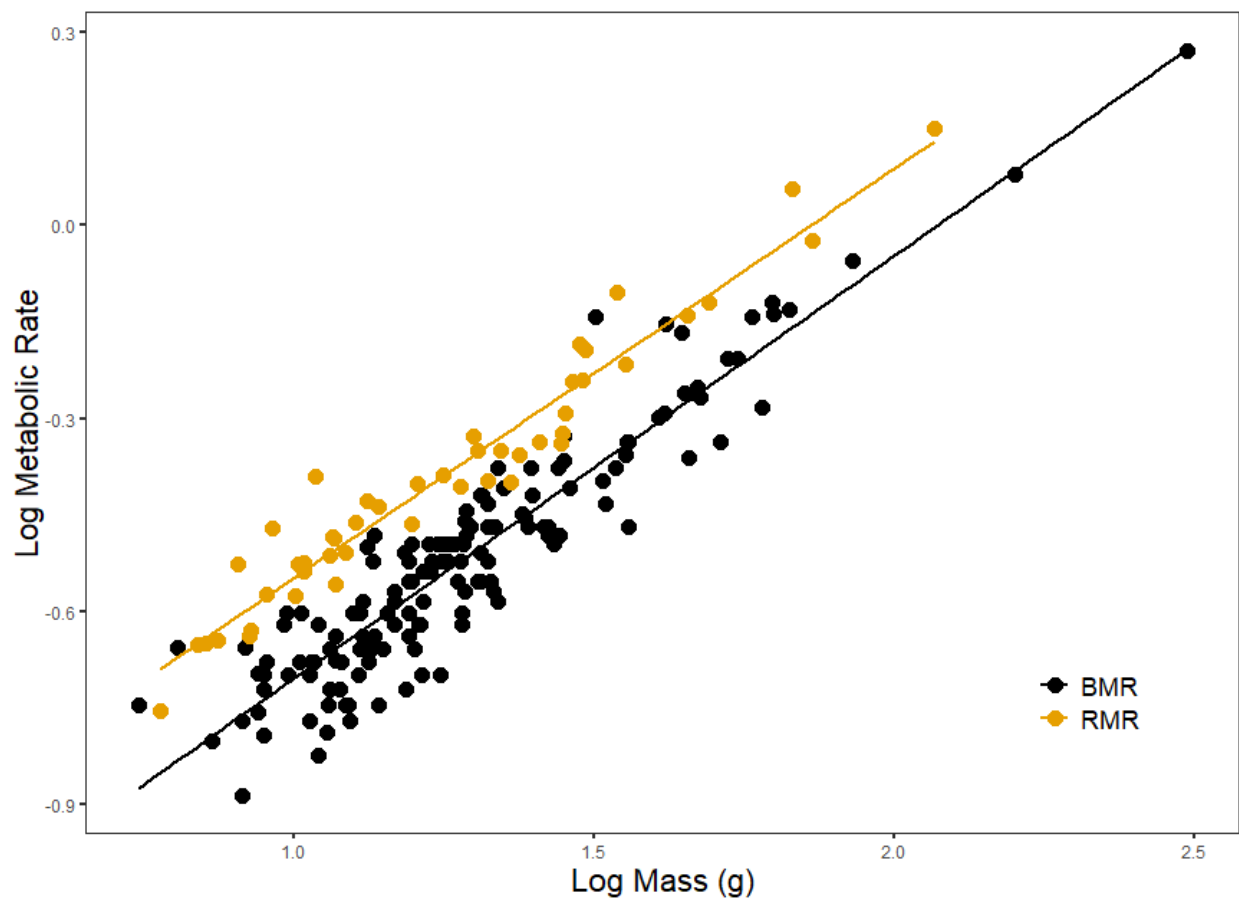

Source: https://www.biorxiv.org/content/10.1101/721779v1.full.pdf
